# Supplementary material
Source: PubMed Central journal article supplement (PMC9575647)
Supplement: 41571_2022_687_MOESM1_ESM.pdf [file 41571_2022_687_MOESM1_ESM.pdf]

## Supplementary information

---

# Systemic therapy for early-stage breast cancer: learning from the past to build the future

---

In the format provided by the authors and unedited

**Supplementary Table 1** | Essential information of the main clinical trials reported in the manuscript.

| Study name     | Hypothesis                                                                                                                   | Population                                                                                 | Study design                                 | Treatments                                                                               | Main results                                                                                                                                                    |
|----------------|------------------------------------------------------------------------------------------------------------------------------|--------------------------------------------------------------------------------------------|----------------------------------------------|------------------------------------------------------------------------------------------|-----------------------------------------------------------------------------------------------------------------------------------------------------------------|
| ALTTO [1]      | Does dual HER2-blockade with trastuzumab (T) and lapatinib (L) improve DFS compared to adjuvant trastuzumab alone?           | HER2-positive early breast cancer                                                          | Randomized, phase III<br>N=8381              | 4 anti-HER2 treatment arms (+ chemotherapy):<br>- T alone<br>- L alone<br>- T+L<br>- T→L | Adjuvant treatment that includes L did not significantly improve DFS compared with T alone and added toxicity. One year of adjuvant T remains standard of care. |
| APHINITY [2]   | Does dual HER2-blockade with trastuzumab (T) and pertuzumab (P) improve invasive DFS compared to adjuvant trastuzumab alone? | Node-positive or high-risk, node-negative HER2-positive operable breast cancer             | Randomized, phase III<br>N=4805              | 2 anti-HER2 treatment arms (+ chemotherapy):<br>- T + P<br>- T alone                     | P significantly improved invasive DFS among patients with HER2-positive, operable breast cancer when it was added to T and chemotherapy.                        |
| BEATRICE [3]   | Does the addition of bevacizumab to adjuvant chemotherapy improve survival?                                                  | Early TNBC                                                                                 | Randomized, phase II<br>N=2591               | 2 arms:<br>- Bevacizumab (1 year) + chemotherapy<br>- Chemotherapy alone                 | No significant survival improvement with the addition of bevacizumab.                                                                                           |
| CREATE-X [4]   | Does post-neoadjuvant capecitabine improve survival in patients with residual disease after neoadjuvant chemotherapy?        | HER2-negative breast cancer, with residual invasive disease after neoadjuvant chemotherapy | Randomized, Phase III<br>N=910 (TNBC, N=286) | 2 arms:<br>- Capecitabine (6-8 cycles)<br>- Control (no treatment)                       | Adjuvant capecitabine improves disease-free survival and overall survival                                                                                       |
| D-CARE [5]     | Does adjuvant denosumab improve survival in early breast cancer?                                                             | Stage II-III early breast cancer                                                           | Randomized, Phase III<br>N=4509              | 2 arms:<br>- Denosumab<br>- Placebo                                                      | Denosumab did not improve disease-related outcomes for women with high-risk early breast cancer                                                                 |
| GeparNuevo [6] | Does the addition of durvalumab to neoadjuvant                                                                               | Early TNBC                                                                                 | Randomized, Phase II<br>N=174                | 2 arms (+ neoadjuvant chemotherapy):<br>- Durvalumab<br>- Placebo                        | Durvalumab was associated with no significant improvement in pCR, but with significant improvement in survival endpoints                                        |

|                   |                                                                                                                                                  |                                                                                            |                               |                                                                                                                                                                                                                                                            |                                                                                                                                  |
|-------------------|--------------------------------------------------------------------------------------------------------------------------------------------------|--------------------------------------------------------------------------------------------|-------------------------------|------------------------------------------------------------------------------------------------------------------------------------------------------------------------------------------------------------------------------------------------------------|----------------------------------------------------------------------------------------------------------------------------------|
|                   | chemotherapy improve patient outcomes?                                                                                                           |                                                                                            |                               |                                                                                                                                                                                                                                                            |                                                                                                                                  |
| KATHERINE [7]     | Does post-neoadjuvant T-DM1 improve survival in patients with residual disease after neoadjuvant chemotherapy, compared to adjuvant trastuzumab? | HER2-positive breast cancer, with residual invasive disease after neoadjuvant chemotherapy | Randomized, Phase III, N=1486 | 2 arms of adjuvant treatments: <ul style="list-style-type: none"> <li>- T-DM1</li> <li>- Trastuzumab</li> </ul>                                                                                                                                            | T-DM1 reduced the risk of recurrence of invasive breast cancer or death compared to trastuzumab                                  |
| KEYNOTE-522 [8,9] | Does the addition of pembrolizumab to neoadjuvant chemotherapy improve outcomes in patients with early TNBC?                                     | Stage II-III early TNBC                                                                    | Randomized, Phase III N=1174  | 2 arms (+ neoadjuvant chemotherapy): <ul style="list-style-type: none"> <li>- Pembrolizumab (neo + adjuvant phase)</li> <li>- Placebo</li> </ul>                                                                                                           | Pembrolizumab was associated with significant improvement in pCR and EFS                                                         |
| MonarchE [10,11]  | Does the addition of abemaciclib to adjuvant endocrine therapy improve outcomes in high-risk HR-positive, HER2-negative early breast cancer?     | High-risk, node-positive, HR-positive, HER2-negative early breast cancer                   | Randomized, Phase III N=5637  | 2 arms: <ul style="list-style-type: none"> <li>- Abemaciclib + endocrine therapy</li> <li>- Endocrine therapy alone</li> </ul>                                                                                                                             | Abemaciclib combined with ET is demonstrated a significant improvement in IDFS                                                   |
| NeoSphere [12]    | Does dual-blockade with pertuzumab and trastuzumab in addition to neoadjuvant chemotherapy improve outcomes compared to trastuzumab alone?       | Locally advanced, inflammatory, or early-stage HER2-positive breast cancer                 | Randomized, Phase II N=417    | 4 arms: <ul style="list-style-type: none"> <li>- trastuzumab + docetaxel (group A)</li> <li>- pertuzumab and trastuzumab plus docetaxel (group B)</li> <li>- pertuzumab and trastuzumab (group C)</li> <li>- pertuzumab and docetaxel (group D)</li> </ul> | Neoadjuvant pertuzumab was beneficial when combined with trastuzumab and docetaxel.                                              |
| OLYMPIA [13]      | Does adjuvant olaparib improve outcomes in patients with BRCA-                                                                                   | HER2-negative, early breast cancer with BRCA1 or BRCA2                                     | Randomized, Phase III N=1836  | 2 arms: <ul style="list-style-type: none"> <li>- Adjuvant olaparib (1 year)</li> <li>- Placebo</li> </ul>                                                                                                                                                  | Olaparib was associated with significantly longer survival free of invasive or distant disease and overall survival than placebo |

|             |                                                                                                                                              |                                                                                                                                       |                               |                                                                               |                                                                                                                                                                              |
|-------------|----------------------------------------------------------------------------------------------------------------------------------------------|---------------------------------------------------------------------------------------------------------------------------------------|-------------------------------|-------------------------------------------------------------------------------|------------------------------------------------------------------------------------------------------------------------------------------------------------------------------|
|             | mutated early breast cancer?                                                                                                                 | germline mutation and high-risk clinicopathological factors who had received local treatment and neoadjuvant or adjuvant chemotherapy |                               |                                                                               |                                                                                                                                                                              |
| PALLAS [14] | Does the addition of palbociclib to adjuvant endocrine therapy improve outcomes in high-risk HR-positive, HER2-negative early breast cancer? | Stage II-III HR-positive, HER2-negative early breast cancer                                                                           | Randomized, Phase III, N=5760 | 2 arms:<br>- Palbociclib (2 years) + endocrine therapy<br>- endocrine therapy | The addition of 2 years of adjuvant palbociclib to adjuvant endocrine therapy did not improve invasive disease-free survival compared with adjuvant endocrine therapy alone. |

## References

- 1 Moreno-Aspitia A, Holmes EM, Jackisch C *et al.* Updated results from the phase III ALTTO trial (BIG 2-06; NCCTG (Alliance) N063D) comparing one year of anti-HER2 therapy with lapatinib alone (L), trastuzumab alone (T), their sequence (T→L) or their combination (L+T) in the adjuvant treatment of HER2-po. *J. Clin. Oncol.* 35(15\_suppl), 502 (2017).
- 2 von Minckwitz G, Procter M, de Azambuja E *et al.* Adjuvant Pertuzumab and Trastuzumab in Early HER2-Positive Breast Cancer. *N. Engl. J. Med.* 377(2), 122–131 (2017).
- 3 Cameron D, Brown J, Dent R *et al.* Adjuvant bevacizumab-containing therapy in triple-negative breast cancer (BEATRICE): primary results of a randomised, phase 3 trial. *Lancet. Oncol.* 14(10), 933–942 (2013).
- 4 Masuda N, Lee S-J, Ohtani S *et al.* Adjuvant Capecitabine for Breast Cancer after Preoperative Chemotherapy. *N. Engl. J. Med.* 376(22), 2147–2159 (2017).
- 5 Coleman R, Finkelstein DM, Barrios C *et al.* Adjuvant denosumab in early breast cancer (D-CARE): an international, multicentre, randomised, controlled, phase 3 trial. *Lancet Oncol.* 21(1), 60–72 (2020).
- 6 Loibl S, Schneeweiss A, Huober JB *et al.* Durvalumab improves long-term outcome in TNBC: results from the phase II randomized GeparNUEVO study

- investigating neoadjuvant durvalumab in addition to an anthracycline/taxane based neoadjuvant chemotherapy in early triple-negative breast cancer (TNBC). *J. Clin. Oncol.* 39(15\_suppl), 506 (2021).
- 7 von Minckwitz G, Huang C-S, Mano MS *et al.* Trastuzumab Emtansine for Residual Invasive HER2-Positive Breast Cancer. *N. Engl. J. Med.* 380(7), 617–628 (2019).
- 8 Schmid P, Cortes J, Puztai L *et al.* Pembrolizumab for early triple-negative breast cancer. *N. Engl. J. Med.* 382(9), 810–821 (2020).
- 9 Schmid P, Cortes J, Dent R *et al.* Event-free Survival with Pembrolizumab in Early Triple-Negative Breast Cancer. *N. Engl. J. Med.* 386(6), 556–567 (2022).
- 10 Johnston SRD, Harbeck N, Hegg R *et al.* Abemaciclib Combined With Endocrine Therapy for the Adjuvant Treatment of HR+, HER2-, Node-Positive, High-Risk, Early Breast Cancer (monarchE). *J. Clin. Oncol. Off. J. Am. Soc. Clin. Oncol.* JCO2002514 (2020).
- 11 Harbeck N, Rastogi P, Martin M *et al.* Adjuvant abemaciclib combined with endocrine therapy for high-risk early breast cancer: updated efficacy and Ki-67 analysis from the monarchE study. *Ann. Oncol. Off. J. Eur. Soc. Med. Oncol.* 32(12), 1571–1581 (2021).
- 12 Gianni L, Pienkowski T, Im Y-H *et al.* 5-year analysis of neoadjuvant pertuzumab and trastuzumab in patients with locally advanced, inflammatory, or early-stage HER2-positive breast cancer (NeoSphere): a multicentre, open-label, phase 2 randomised trial. *Lancet. Oncol.* 17(6), 791–800 (2016).
- 13 Tutt ANJ, Garber JE, Kaufman B *et al.* Adjuvant Olaparib for Patients with BRCA1- or BRCA2-Mutated Breast Cancer. *N. Engl. J. Med.* 384(25), 2394–2405 (2021).
- 14 Gnant M, Dueck AC, Frantal S *et al.* Adjuvant Palbociclib for Early Breast Cancer: The PALLAS Trial Results (ABCSG-42/AFT-05/BIG-14-03). *J. Clin. Oncol. Off. J. Am. Soc. Clin. Oncol.* 40(3), 282–293 (2022).
